# Supplementary material
Source: Research Square preprint supplement (doi:10.21203/rs.3.rs-8833836/v1)
Supplement: Supplementary file 1 [file ac75a81f2be231deb50ba785.docx]

**SUPPLEMENTARY FIGURES**


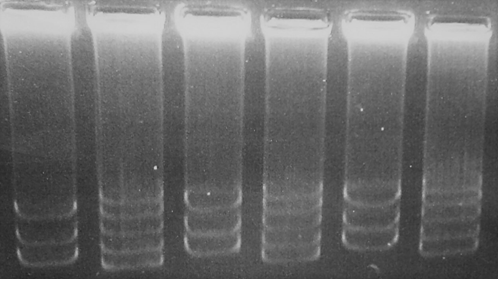


**1**

**2**

**3**

**4**

**5**

**6**

Supplementary Figure 1. Plasmid patterns in agarose gel stained with ethidium bromide obtained by the Eckhardt procedure. Lanes: 1, 3, 5 ACO34-A. Lanes 2, 4, 6 *Rhizobium. etli* CFN 42 as reference of profiles.


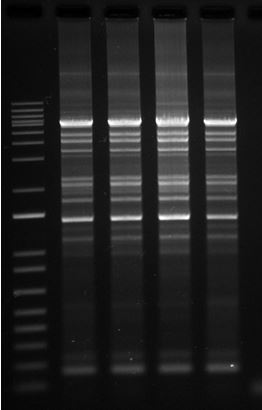


**1**

**2**

**3**

**4**

**5**

Supplementary Figure 2. Genomic fingerprints obtained by PCR and ERIC primers. Lanes 1) 1Kb molecular weight DNA ladder, 2) ACO-34A, 3), 4), 5) NifH mutants
